# Supplementary material for: A Review on UAV-Based Applications for Plant Disease Detection and Monitoring
Source: MDPI journal article supplement (doi:10.3390/rs15174273), 2023-08-31
Supplement: s1 [file s1]

**Table S1.** List of the plant diseases and their causal pathogenic organisms as reviewed in the systematic quantitative literature review.

| Plant           | Disease                       | Causal organism                                                                                      | Biological group     | Type         |
|-----------------|-------------------------------|------------------------------------------------------------------------------------------------------|----------------------|--------------|
| Apple tree      | Cedar rust                    | <i>Gymnosporangium juniperi-virginianae</i>                                                          | Fungus               | Biotroph     |
|                 | Scab                          | <i>Venturia inaequalis</i> Cooke (Wint.)                                                             | Fungus               | Hemibiotroph |
|                 | Fire blight                   | <i>Erwinia amylovora</i>                                                                             | Bacterium            | Biotroph     |
| Areca palm      | Yellow leaf disease           | Areca palm velarivirus 1                                                                             | Virus                | Biotroph     |
| Banana          | Yellow sigatoka               | <i>Mycosphaerella musicola</i> Leach                                                                 | Fungus               | Necrotroph   |
|                 | Xanthomonas wilt of banana    | <i>Xanthomonas vasicola</i> pv. <i>musacearum</i>                                                    | Bacterium            | Biotroph     |
|                 | Banana bunchy top virus       | <i>Babuvirus</i> spp.                                                                                | Virus                | Biotroph     |
|                 | Fusarium wilt                 | <i>Fusarium oxysporum</i> f. sp. <i>cubense</i> race 4                                               | Fungus               | Biotroph     |
| Bermudagrass    | Spring dead spot              | <i>Ophiosphaerella herpotricha</i> and <i>O. Korrae</i>                                              | Fungi                | Biotroph     |
| Citrus          | Citrus canker                 | <i>Xanthomonas citri</i> subsp. <i>citri</i>                                                         | Bacterium            | Biotroph     |
|                 | Citrus huanglongbing disease  | <i>Candidatus Liberibacter asiaticus</i>                                                             | Bacterium            | Biotroph     |
|                 | Phytophthora foot rot         | <i>Candidatus Liberibacter asiaticus</i>                                                             | Bacterium            | Biotroph     |
|                 | Citrus gummosis disease       | <i>Phytophthora</i> spp.                                                                             | Fungus-like oomycete | Biotroph     |
| Coffee          | Coffee leaf rust              | <i>Hemileia vastatrix</i>                                                                            | Fungus               | Biotroph     |
| Cotton          | Cotton root rot               | <i>Phymatotrichopsis omnivora</i>                                                                    | Fungus               | Necrotrophic |
| Eucalyptus tree | Various leaf diseases         | n.a.                                                                                                 | n.a.                 | n.a.         |
| Grapevine       | Grapevine leaf stripe         | <i>Phaeomoniella chlamydospora</i> , <i>Phaeoacremonium</i> spp. and <i>Fomitiporia mediterranea</i> | Fungi                | Biotroph     |
|                 | Flavescence doree phytoplasma | <i>Candidatus Phytoplasma vitis</i>                                                                  | Bacterium            | Biotroph     |
|                 | Black rot                     | <i>Guignardia bidwellii</i>                                                                          | Fungus               | Biotroph     |
|                 | Isariopsis leaf spot          | <i>Pseudocercospora vitis</i>                                                                        | Fungus               | Biotroph     |
| Kiwifruit       | Kiwifruit decline             | <i>Phytophthora chamaehyphon</i> , <i>Phytophthora vexans</i> and <i>Fusarium solani</i>             | Stramenopila, Fungus | Biotroph     |
| Lettuce         | Soft rot                      | <i>Pectobacterium carotovorum</i> subsp. <i>Carotovorum</i>                                          | Bacterium            | Biotroph     |
| Maize           | Northern leaf blight          | <i>Setosphaeria turcica</i> (Luttrell) Leonard & Suggs (anamorph <i>Exserohilum turcicum</i> )       | Fungus               | Biotroph     |

| Plant          | Disease                    | Causal organism                                                       | Biological group | Type         |
|----------------|----------------------------|-----------------------------------------------------------------------|------------------|--------------|
|                | Southern leaf blight       | <i>Puccinia polysora</i> Underw.                                      | Fungus           | Biotroph     |
|                | Maize streak virus disease | Maize streak virus                                                    | Virus            | Biotroph     |
|                | Tar spot                   | <i>Phyllachora maydis</i>                                             | Fungus           | Biotroph     |
| Norway spruce  | Needle bladder rust        | <i>Chrysomyxa rhododendri</i>                                         | Fungus           | Biotroph     |
| Oil palm       | Basal stem rot             | <i>Ganoderma boninense</i>                                            | Fungus           | Hemibiotroph |
| Oilseed rape   | Sclerotinia                | <i>Sclerotinia sclerotiorum</i> (Lib.) De Bary                        | Fungus           | Necrotroph   |
| Okra           | Cercospora leaf spot       | <i>Cercospora abelmoschi</i>                                          | Fungus           | Biotroph     |
| Olive tree     | Verticillium wilt          | <i>Verticillium dahliae</i> Kleb                                      | Fungus           | Biotroph     |
|                | <i>Xylella fastidiosa</i>  | <i>Xylella fastidiosa</i>                                             | Bacterium        | Biotroph     |
|                | Peacock spot               | <i>Venturia oleaginea</i>                                             | Fungus           | Biotroph     |
| Onion          | Anthraxnose-twister        | <i>Olletotrichum gloeosporioides</i> , <i>Gibberella moniliformis</i> | Fungi            | Hemibiotroph |
|                | Stemphylium leaf blight    | <i>Stemphylium vesicarium</i>                                         | Fungus           | Biotroph     |
| Opium poppy    | Downy mildew               | <i>Peronospora arborescens</i> (Berk.)                                | Fungus           | Biotroph     |
| Paperbark tree | Myrtle rust                | <i>Austropuccinia psidii</i>                                          | Fungus           | Biotroph     |
| Peach tree     | Fire blight                | <i>Erwinia amylovora</i>                                              | Bacterium        | Biotroph     |
| Peanut         | Bacterial wilt             | <i>Ralstonia solanacearum</i>                                         | Bacterium        | Biotroph     |
| Pine tree      | Pine wilt disease          | <i>Bursaphelenchus xylophilus</i>                                     | Nematode         | Biotroph     |
|                | Red band needle blight     | <i>Dothistroma septosporum</i>                                        | Fungus           | Biotroph     |
| Potato         | Potato late blight         | <i>Phytophthora infestans</i> (Mont.) De Bary                         | Fungus           | Biotroph     |
|                | Potato early blight        | <i>Alternaria solani</i> Sorauer                                      | Fungus           | Biotroph     |
|                | Potato Y virus             | Potato Y virus                                                        | Virus            | Biotroph     |
|                | Vascular wilt              | <i>Pseudomonas solanacearum</i>                                       | Bacterium        | Biotroph     |
|                | Soft rot                   | <i>Erwinia bacteria</i>                                               | Bacterium        | Biotroph     |
| Radish         | Fusarium wilt              | <i>Fusarium oxysporum</i>                                             | Fungus           | Biotroph     |
| Rice           | Sheath blight              | <i>Rhizoctonia solani</i> AG1-1A                                      | Fungus           | Necrotroph   |
|                | Bacterial leaf blight      | <i>Xanthomonas oryzae</i> pv. <i>Oryzae</i>                           | Bacterium        | Biotroph     |
|                | Bacterial panicle blight   | <i>Burkholseria glumae</i>                                            | Bacterium        | Biotroph     |
| Soybean        | Target spot                | <i>Corynespora cassiicola</i>                                         | Fungus           | Necrotroph   |

| Plant       | Disease                       | Causal organism                                                              | Biological group     | Type         |
|-------------|-------------------------------|------------------------------------------------------------------------------|----------------------|--------------|
|             | Powdery mildew                | <i>Microsphaera diffusa</i>                                                  | Fungus               | Biotroph     |
| Squash      | Powdery mildew                | <i>Podosphaera xanthii</i>                                                   | Fungus               | Biotroph     |
| Sugar beet  | Cercospora leaf spot          | <i>Cercospora beticola</i> Sacc.                                             | Fungus               | Biotroph     |
|             | Anthracnose                   | <i>Colletotrichum lindemuthianum</i> (Sacc. & Magn.)                         | Fungus               | Biotroph     |
|             | Alternaria leaf spot          | <i>Alternaria alternata</i>                                                  | Fungus               | Necrotroph   |
|             | Beet cyst nematode            | <i>Heterodera schachtii</i>                                                  | Nematode             | Parasite     |
| Sugarcane   | White leaf phytoplasma        | <i>Phytoplasma</i> spp.                                                      | Bacterium            | Biotroph     |
| Switchgrass | Rust disease                  | <i>Puccinia novopanici</i>                                                   | Fungus               | Biotroph     |
| Tea         | Anthracnose                   | <i>Gloeosporium theae-sinensis</i> Miyake                                    | Fungus               | Biotroph     |
| Tomato      | Bacterial spot                | <i>Xanthomonas campestris</i> pv. <i>Vesicatoria</i> and <i>X. perforans</i> | Bacteria             | Biotroph     |
|             | Early blight                  | <i>Alternaria solani</i>                                                     | Fungus               | Biotroph     |
|             | Late blight                   | <i>Phytophthora infestans</i>                                                | Fungus-like oomycete | Hemibiotroph |
|             | Septoria leaf spot            | <i>Septoria lycopersici</i>                                                  | Fungus               | Biotroph     |
|             | Tomato mosaic virus           | Tomato mosaic virus                                                          | Virus                | Biotroph     |
|             | Leaf mold                     | <i>Fulvia fulva</i>                                                          | Fungus               | Biotroph     |
|             | Target leaf spot              | <i>Corynespora cassiicola</i>                                                | Fungus               | Biotroph     |
|             | Tomato yellow leaf curl virus | Tomato yellow leaf curl virus                                                | Virus                | Biotroph     |
|             |                               |                                                                              |                      |              |
| Watermelon  | Gummy stem blight             | <i>Didymella bryoniae</i>                                                    | Fungus               | Biotroph     |
|             | Anthracnose                   | <i>Colletotrichum orbiculare</i>                                             | Fungus               | Hemibiotroph |
|             | Fusarium wilt                 | <i>Fusarium oxysporum</i> f. sp. <i>niveum</i>                               | Fungus               | Hemibiotroph |
|             | Phytophthora fruit rot        | <i>Phytophthora capsici</i>                                                  | Fungus-like oomycete | Hemibiotroph |
|             | Alternaria leaf spot          | <i>Alternaria cucumerina</i>                                                 | Fungus               | Biotroph     |
|             | Cucurbit leaf crumple         | Cucurbit leaf crumple virus                                                  | Virus                | Biotroph     |
|             | Downy mildew                  | <i>Pseudoperonospora cubensis</i>                                            | Fungus-like oomycete | Biotroph     |
| Wheat       | Yellow rust                   | <i>Puccinia striiformis</i> f. sp. <i>tritici</i>                            | Fungus               | Biotroph     |
|             | Leaf rust                     | <i>Puccinia triticina</i>                                                    | Fungus               | Biotroph     |
|             | Septoria leaf spot            | <i>Zymoseptoria tritici</i>                                                  | Fungus               | Hemibiotroph |

| Plant | Disease              | Causal organism                                                       | Biological group | Type         |
|-------|----------------------|-----------------------------------------------------------------------|------------------|--------------|
|       | Wheat powdery mildew | <i>Blumeria graminum</i> f. sp. <i>tritici</i>                        | Fungus           | Biotroph     |
|       | Tan spot             | <i>Pyrenophora tritici-repentis</i>                                   | Fungus           | Necrotroph   |
|       | Fusarium head blight | Complex of <i>Fusarium graminearum</i> Schwabe and <i>F. culmorum</i> | Fungus           | Hemibiotroph |
